# Supplementary material for: “As du Coeur” study: a randomized controlled trial on quality of life impact and cost effectiveness of a physical activity program in patients with cardiovascular disease
Source: Springer Nature journal article supplement (doi:10.1186/s12872-018-0973-3), 2018-12-01
Supplement: MOESM1 [file 16320158]

## Questionnaires used in the « As du cœur » study

### Mesure du Qaly (*Quality Adjusted Life Years*)

#### Le questionnaire EQ-5D-3L

##### Mobilité

1. Je n'ai aucun problème pour me déplacer à pied.
2. J'ai des problèmes pour me déplacer à pied.
3. Je suis obligé(e) de rester alité(e).

##### Autonomie de la personne

1. Je n'ai aucun problème pour prendre soin de moi.
2. J'ai des problèmes pour me laver ou m'habiller tout(e) seul(e).
3. Je suis incapable de me laver ou de m'habiller tout(e) seul(e).

##### Activités courantes

1. Je n'ai aucun problème pour accomplir mes activités courantes (e.g. travail, études, travaux domestiques, activités familiales ou loisirs).
2. J'ai des problèmes pour accomplir mes activités courantes.
3. Je suis incapable d'accomplir mes activités courantes.

##### Douleurs/gêne

1. Je n'ai ni douleurs ni gêne.
2. J'ai des douleurs ou une gêne modérée(s).
3. J'ai des douleurs ou une gêne extrême(s).

##### Anxiété/Dépression

1. Je ne suis ni anxieux (se) ni déprimé(e).
2. Je suis modérément anxieux (se) ou déprimé(e).
3. Je suis extrêmement anxieux (se) ou déprimé(e).

### EQ-5D-3L (UK English)

By placing a tick in one box in each group below, please indicate which statements best describe your own health state today.

#### **Mobility**

- I have no problems in walking about
- I have some problems in walking about
- I am confined to bed

#### **Self-Care**

- I have no problems with self-care
- I have some problems washing or dressing myself
- I am unable to wash or dress myself

#### **Usual Activities**

*(e.g. work, study, housework, family or leisure activities)*

- I have no problems with performing my usual activities
- I have some problems with performing my usual activities
- I am unable to perform my usual activities

#### **Pain/Discomfort**

- I have no pain or discomfort
- I have moderate pain or discomfort
- I have extreme pain or discomfort

#### **Anxiety/Depression**

- I am not anxious or depressed
- I am moderately anxious or depressed
- I am extremely anxious or depressed

Source :

Mandy van Reenen and Mark Oppe, “EQ5D User guide”, April 2015, p. 5.

## Questionnaire généraliste de Qualité de vie SF 36

Wade JE, Sherbourne CD. The MOS 36-item short-form health survey (SF-36). Medical Care 1992;30:473-483.

*Madame, Monsieur,*

*Merci de bien vouloir remplir ce questionnaire en lisant bien les questions et les instructions*

*Cela permettra d'apprécier votre ressenti par rapport à vos problèmes de santé et de pouvoir prendre en compte r les progrès ou les éventuels problèmes.*

*Avec tous nos remerciements*

### QUESTIONNAIRE

**1.- En général, diriez-vous que votre santé est :** (entourez ce que vous ressentez)

Excellente \_ \_ Très bonne \_ \_ Bonne \_ \_ Satisfaisante \_ \_ Mauvaise

**2.- Par comparaison avec il y a un an, que diriez-vous sur votre santé aujourd'hui par rapport à il y a 1 an ?**

Bien meilleure \_ Un peu meilleure \_ A peu près identique \_ Un peu moins bonne \_ Pire

**3.- Vous pourriez vous livrer aux activités suivantes le même jour. Est-ce que votre état de santé vous impose des limites dans ces activités ? Si oui, dans quelle mesure ?** (entourez la flèche).

a. **Activités intenses** : courir, soulever des objets lourds, faire du sport.

\_\_\_\_\_ ↓ \_\_\_\_\_ ↓ \_\_\_\_\_ ↓  
oui, très limité                      oui, plutôt limité                      pas limité du tout

b. **Activités modérées** : déplacer une table, passer l'aspirateur.

\_\_\_\_\_ ↓ \_\_\_\_\_ ↓ \_\_\_\_\_ ↓  
oui, très limité                      oui, plutôt limité                      pas limité du tout

c. **Soulever et transporter les achats d'alimentation.**

\_\_\_\_\_ ↓ \_\_\_\_\_ ↓ \_\_\_\_\_ ↓  
oui, très limité                      oui, plutôt limité                      pas limité du tout

d. **Monter plusieurs étages à la suite.**

\_\_\_\_\_ ↓ \_\_\_\_\_ ↓ \_\_\_\_\_ ↓  
oui, très limité                      oui, plutôt limité                      pas limité du tout

e. **Monter un seul étage.**

\_\_\_\_\_ ↓ \_\_\_\_\_ ↓ \_\_\_\_\_ ↓  
oui, très limité                      oui, plutôt limité                      pas limité du tout

f. **Vous agenouiller, vous accroupir ou vous pencher très bas.**

\_\_\_\_\_ ↓ \_\_\_\_\_ ↓ \_\_\_\_\_ ↓

oui, très limité

oui, plutôt limité

pas limité du tout

**g. Marcher plus d'un kilomètre et demi.**

\_\_\_\_\_ ↓ \_\_\_\_\_ ↓ \_\_\_\_\_ ↓  
oui, très limité                      oui, plutôt limité                      pas limité du tout

**h. Marcher plus de 500 mètres**

\_\_\_\_\_ ↓ \_\_\_\_\_ ↓ \_\_\_\_\_ ↓  
oui, très limité                      oui, plutôt limité                      pas limité du tout

**i. Marcher seulement 100 mètres.**

\_\_\_\_\_ ↓ \_\_\_\_\_ ↓ \_\_\_\_\_ ↓  
oui, très limité                      oui, plutôt limité                      pas limité du tout

**j. Prendre un bain, une douche ou vous habiller.**

\_\_\_\_\_ ↓ \_\_\_\_\_ ↓ \_\_\_\_\_ ↓  
oui, très limité                      oui, plutôt limité                      pas limité du tout

**4.- Au cours des 4 dernières semaines, avez-vous eu l'une des difficultés suivantes au travail ou lors des activités courantes, du fait de votre santé ? (réponse : entourez oui ou non à chaque ligne)**

|                                                                   |     |     |
|-------------------------------------------------------------------|-----|-----|
| Limitier le temps passé au travail, ou à d'autres activités ?     | oui | non |
| Faire moins de choses que vous ne l'espérez ?                     | oui | non |
| Trouver des limites au type de travail ou d'activités possibles ? | oui | non |
| Arriver à tout faire, mais au prix d'un effort                    | oui | non |

**5.- Au cours des 4 dernières semaines, avez-vous eu des difficultés suivantes au travail ou lors des activités courantes parce que vous étiez déprimé ou anxieux ? (réponse : oui ou non à chaque ligne).**

|                                                                             |     |     |
|-----------------------------------------------------------------------------|-----|-----|
| Limitier le temps passé au travail, ou à d'autres activités ?               | oui | non |
| Faire moins de choses que vous n'espérez ?                                  | oui | non |
| Ces activités n'ont pas été accomplies aussi soigneusement que d'habitude ? | oui | non |

**6.- Au cours des 4 dernières semaines, dans quelle mesure est-ce que votre état physique ou mental ont perturbé vos relations avec la famille, les amis, les voisins ou d'autres groupes ?**

\_\_\_\_\_ ↓ \_\_\_\_\_ ↓ \_\_\_\_\_ ↓ \_\_\_\_\_ ↓  
 — pas du tout                      très peu                      assez fortement  
       énormément

**7.- Avez-vous enduré des souffrances physiques au cours des 4 dernières semaines ?**

\_\_\_\_\_ ↓ \_\_\_\_\_ ↓ \_\_\_\_\_ ↓ \_\_\_\_\_ ↓  
 — pas du tout                      très peu                      assez fortement



tout le temps      très souvent      parfois      peu souvent      jamais

**10.- Au cours des 4 dernières semaines, votre état physique ou mental a-t-il gêné vos activités sociales comme des visites aux amis, à la famille, etc ?**

\_\_\_\_\_↓\_\_\_\_\_↓\_\_\_\_\_↓\_\_\_\_\_↓\_\_\_\_\_↓\_\_\_\_\_  
tout le temps      très souvent      parfois      peu souvent      jamais

**11.- Ces affirmations sont-elles vraies ou fausses dans votre cas ?**

**a. il me semble que je tombe malade plus facilement que d'autres.**

\_\_\_\_\_↓\_\_\_\_\_↓\_\_\_\_\_↓\_\_\_\_\_↓\_\_\_\_\_↓\_\_\_\_\_  
—  
tout à fait vrai      assez vrai      ne sais pas      plutôt faux      faux

**b. ma santé est aussi bonne que celle des gens que je connais.**

\_\_\_\_\_↓\_\_\_\_\_↓\_\_\_\_\_↓\_\_\_\_\_↓\_\_\_\_\_↓\_\_\_\_\_  
—  
tout à fait vrai      assez vrai      ne sais pas      plutôt faux      faux

**c. je m'attends à ce que mon état de santé s'aggrave.**

\_\_\_\_\_↓\_\_\_\_\_↓\_\_\_\_\_↓\_\_\_\_\_↓\_\_\_\_\_↓\_\_\_\_\_  
—  
tout à fait vrai      assez vrai      ne sais pas      plutôt faux      faux

**d. mon état de santé est excellent.**

\_\_\_\_\_↓\_\_\_\_\_↓\_\_\_\_\_↓\_\_\_\_\_↓\_\_\_\_\_↓\_\_\_\_\_  
—  
tout à fait vrai      assez vrai      ne sais pas      plutôt faux      faux

COMMENTAIRES EVENTUELS OU REMARQUES

## Tests de capacité fonctionnelle

### Tests de condition physique validés par la Société Française de Médecine de l'Exercice et du Sport (SFMES)

- **Test des 6 minutes marche** : Le test des 6 minutes mesure la distance parcourue par un patient en six minutes.

Afin que les évaluations soient comparables d'une évaluation à l'autre, d'un patient à l'autre et d'un centre à l'autre, le parcours sera standardisé de la façon suivante : le parcours devra être parfaitement plat, d'une distance de 50 m que le patient effectuera en aller/retour autour d'un plot ou d'une chaise (la mesure du parcours de 50 m devra tenir compte de la portion nécessaire au retournement).

Ce test initialement utilisé pour évaluer les capacités d'endurance et à l'effort des participants permet parallèlement l'évaluation des capacités locomotrices.
